# Supplementary material for: Assessing the tropical Atlantic biogeochemical processes in the Norwegian Earth System Model
Source: Copernicus journal article supplement (doi:10.5194/bg-21-4149-2024), 2024-09-26
Supplement: Supplementary file 1 [file bg-21-4149-2024-supplement.pdf]

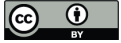

*Supplement of*

## **Assessing the tropical Atlantic biogeochemical processes in the Norwegian Earth System Model**

**Shunya Koseki et al.**

*Correspondence to:* Shunya Koseki ([shunya.koseki@uib.no](mailto:shunya.koseki@uib.no))

The copyright of individual parts of the supplement might differ from the article licence.

## Supplementary Information of Koseki et al.

Here, we would like to have supplementary figures for Koseki et al. This information consists of 5 figures.

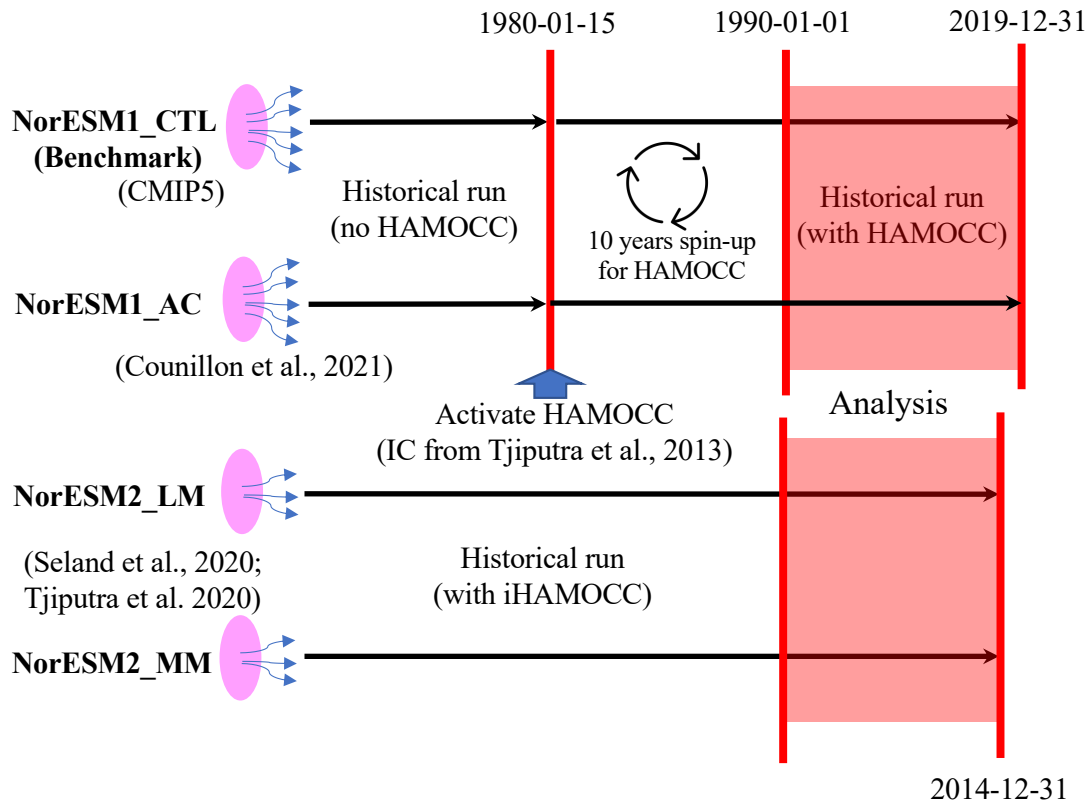

**Figure S1.** Schematic of experimental designs of NorESMs

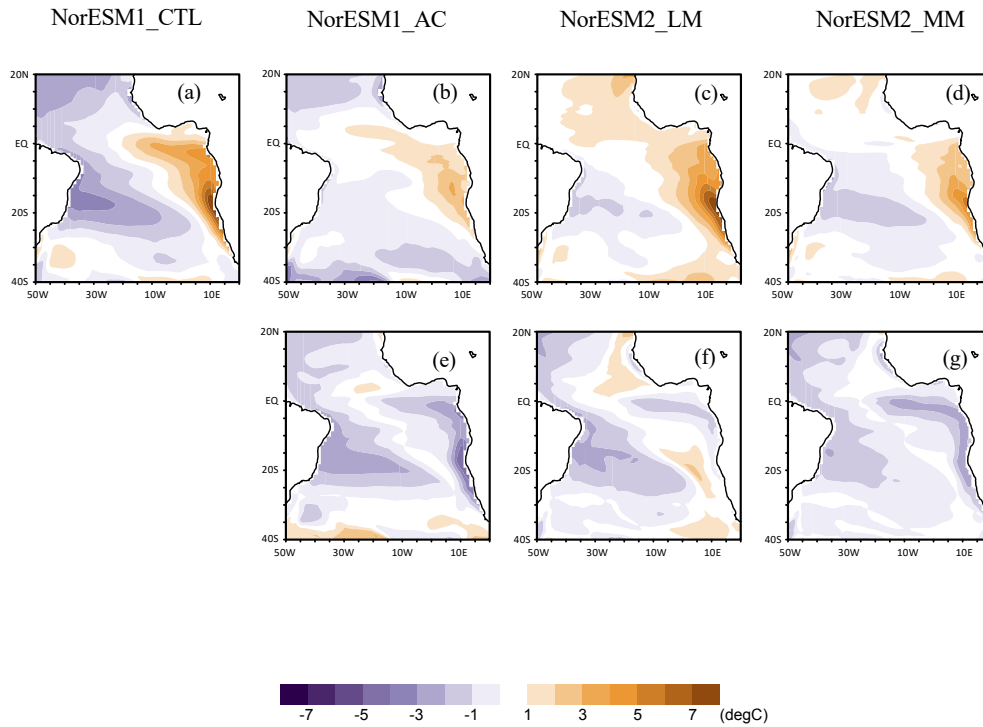

**Figure S2**  
Same as Fig. 1, but for summer (June-July-August) climatology

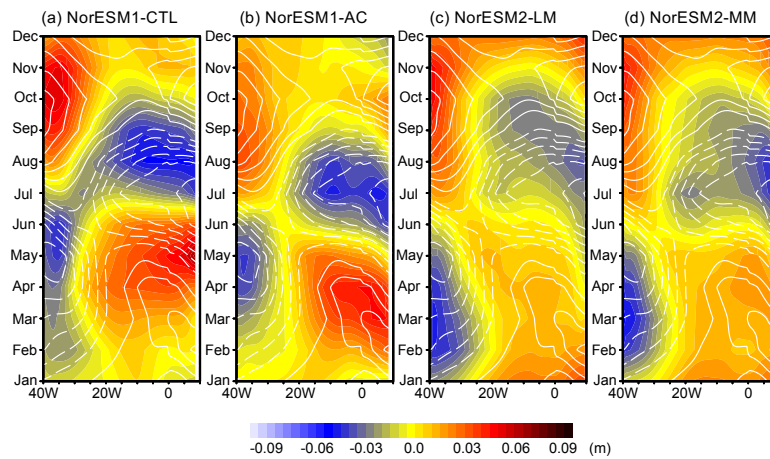

**Figure S3.** Hovmöller plot of sea surface height anomaly from annual mean (averaged between 3S-3N). The contour is for AVISO observation (countouru interval is 0.01m, 1993-2001) and color is for NorESM simulations.

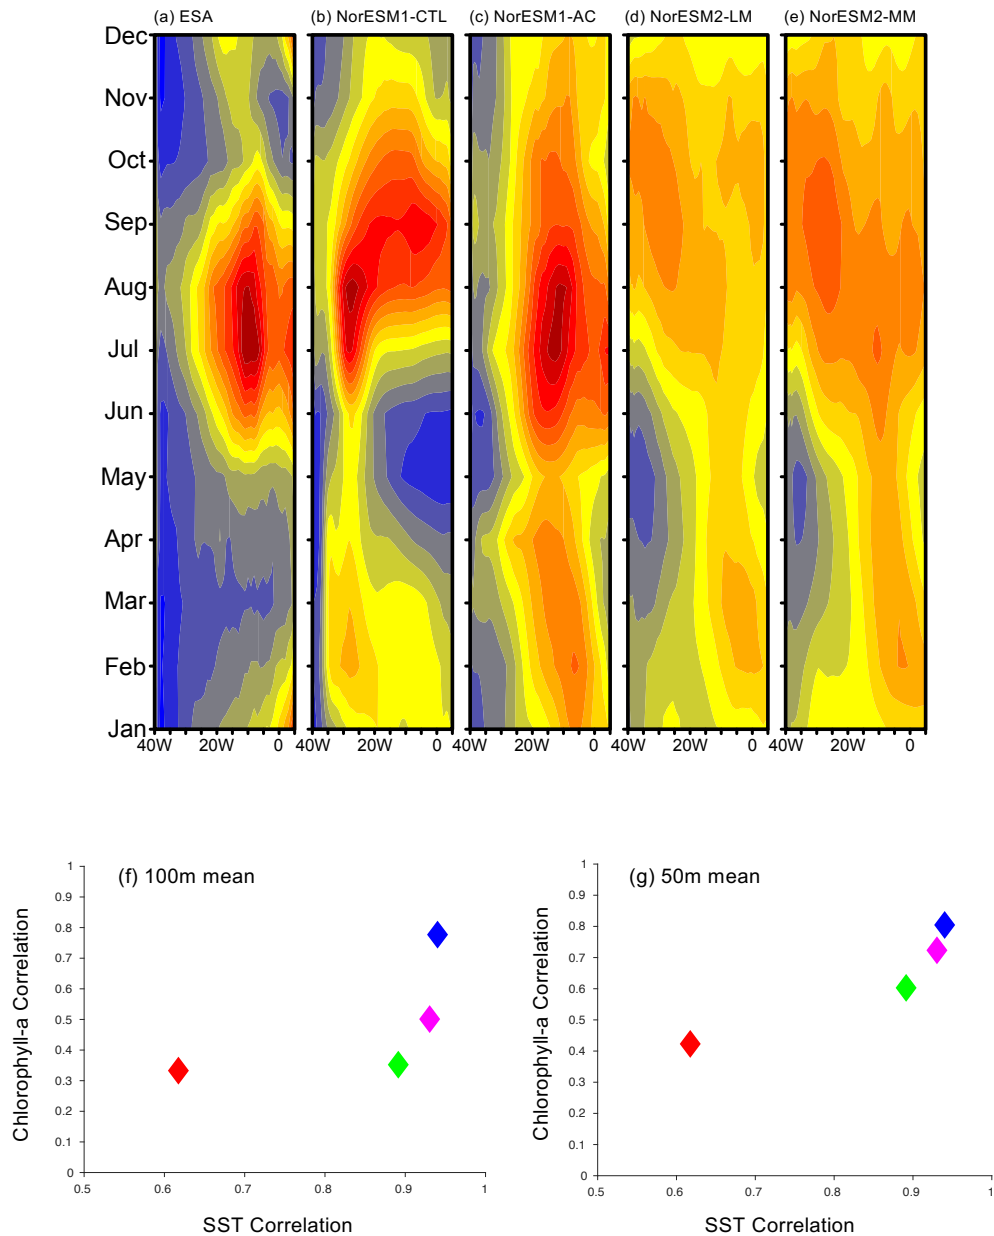

**Figure S4**

(a)-(e) Same as Fig. 3, but for 50m-mean chlorophyll-a from observation and NorESM simulations. (f) and (g) same as Fig. 5b, but for 100m-mean and 50m-mean chlorophyll-a ( $\text{mg m}^{-3}$ ). For the NorESM simulations, phytoplankton concentration ( $\text{mol P m}^{-3}$ ) is converted to chlorophyll-a ( $\text{mg m}^{-3}$ ) by a factor of  $1000 \times 12.01 \times 122 / 60$ .

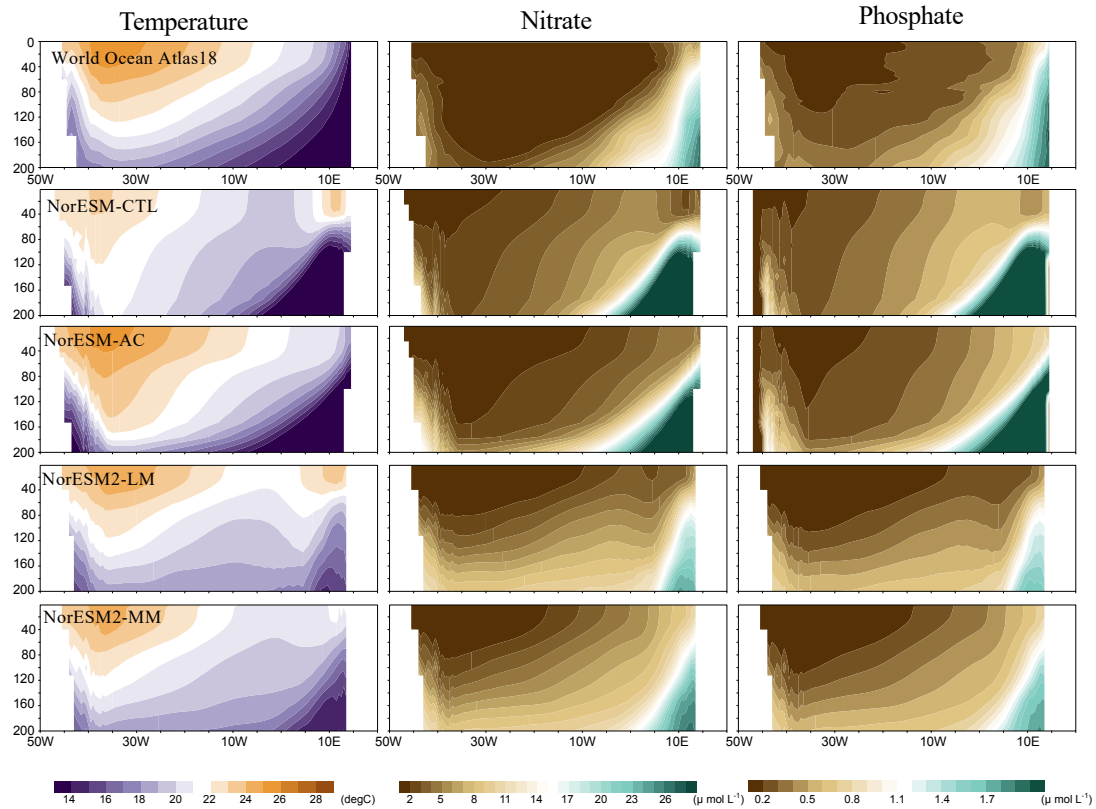

**Figure S5**  
 Depth-longitude section of annual-mean climatology for (left) temperature, (middle) nitrate, and (right) phosphate averaged 25°S and 18°S in observations and each NorESM simulation.

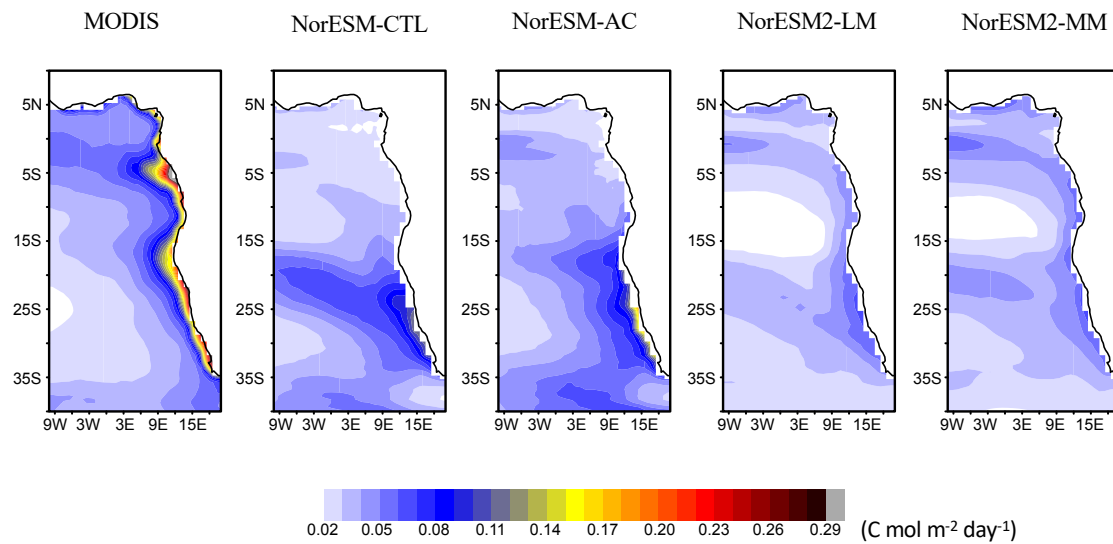

**Figure S6**  
 Annual-mean climatology for primary production in observations and each NorESM simulation.

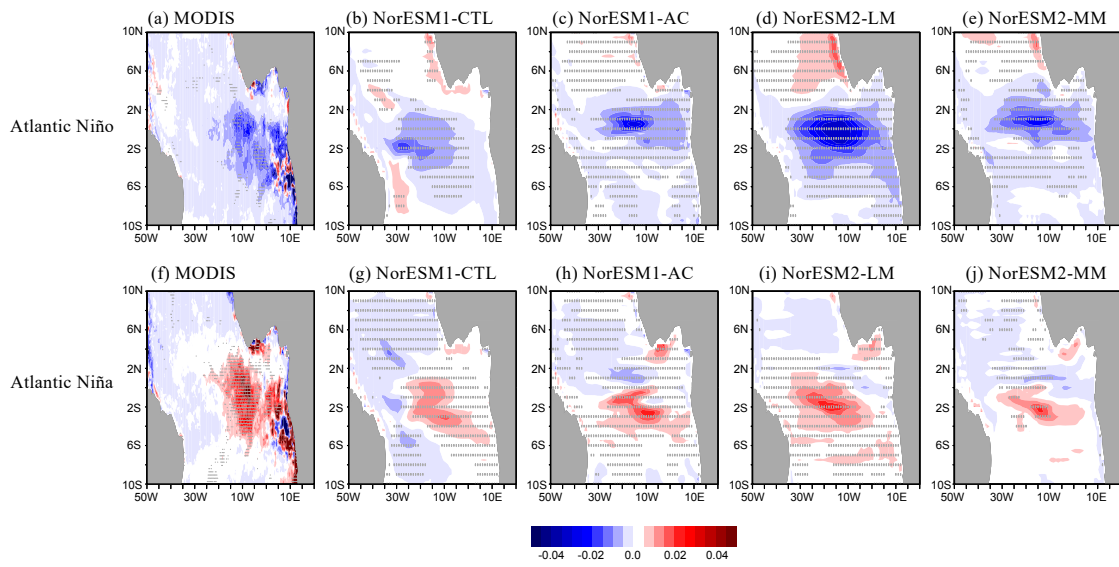

**Figure S7**

Composite anomalies of primary production for observation and NorESM simulation for (top) Atlantic Niño and (bottom) Atlantic Niña in June-July, respectively.
